# Supplementary material for: Succinate causes pathological cardiomyocyte hypertrophy through GPR91 activation
Source: PubMed Central journal article supplement (PMC4296677; doi:10.1186/s12964-014-0078-2), 2014-12-24
Supplement: 12964_2014_78_MOESM4_ESM.pdf [file 12964_2014_78_MOESM4_ESM.pdf]

**A**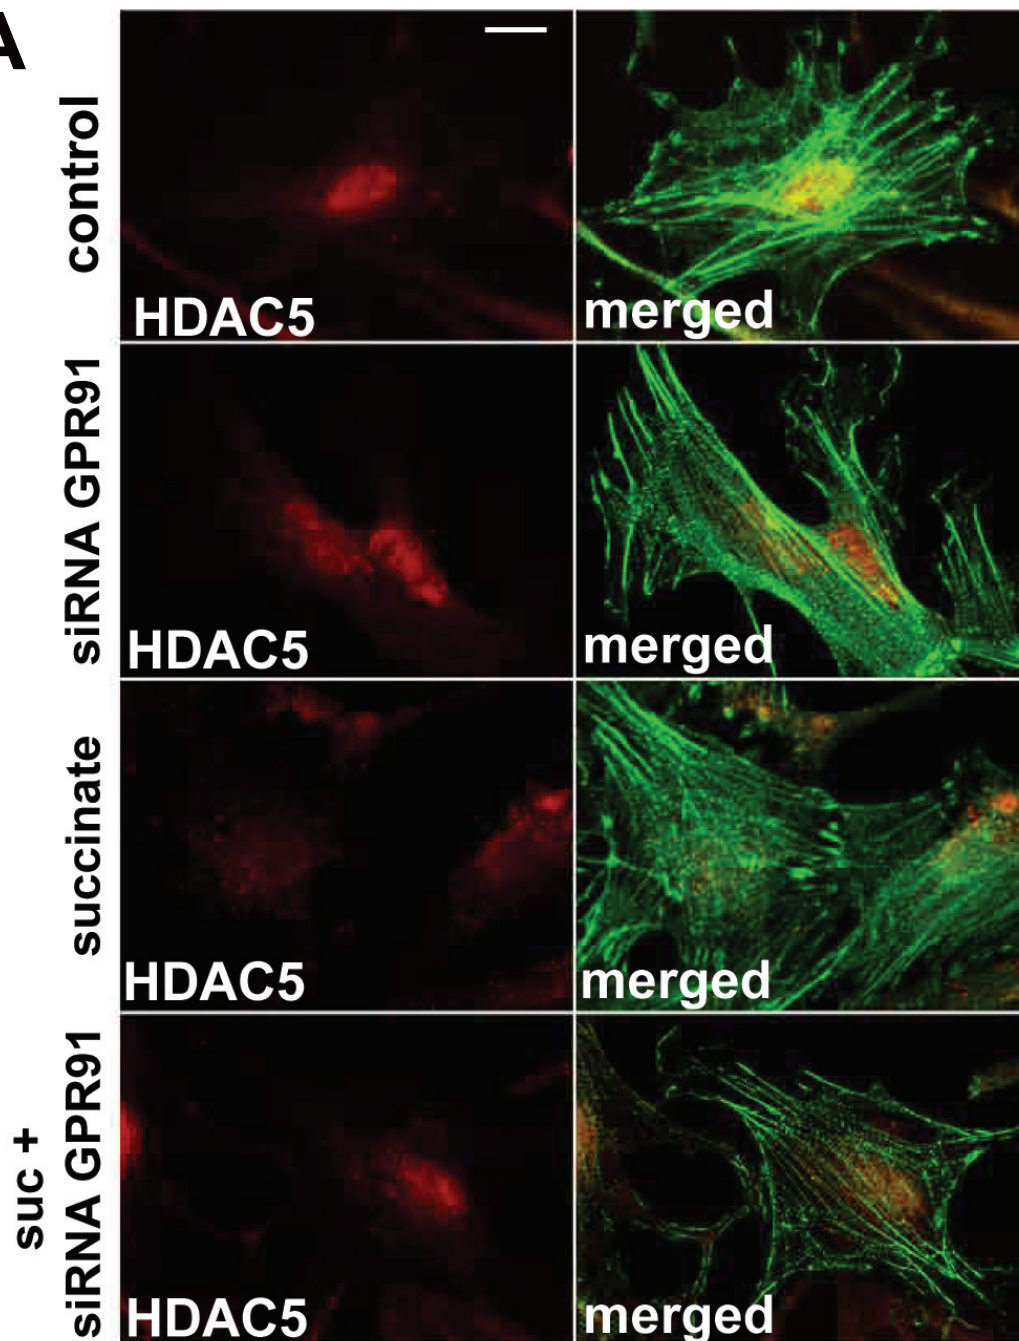

**Aguiar, C . J. *et. al.*  
supplementary 4A**

**B**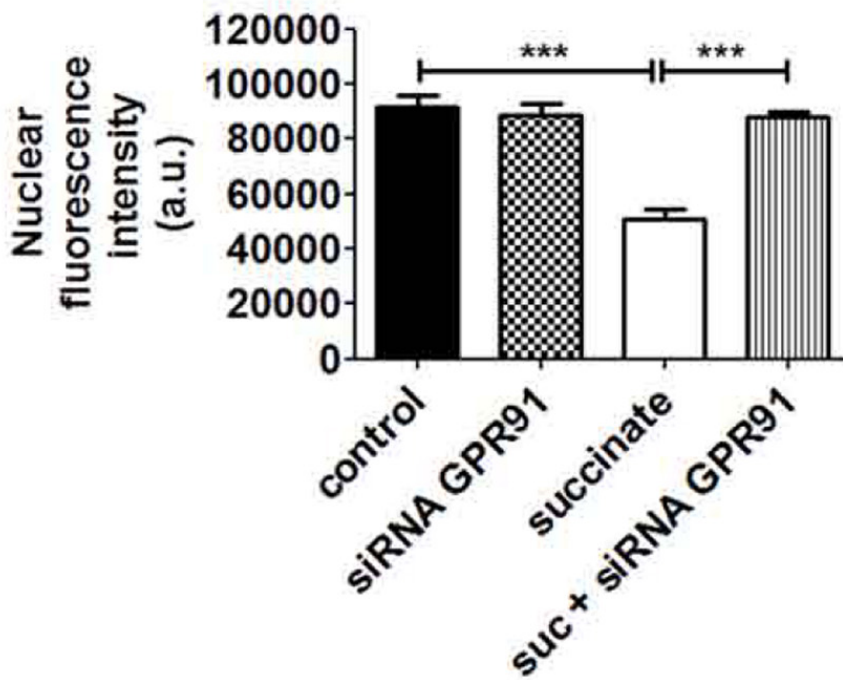**C**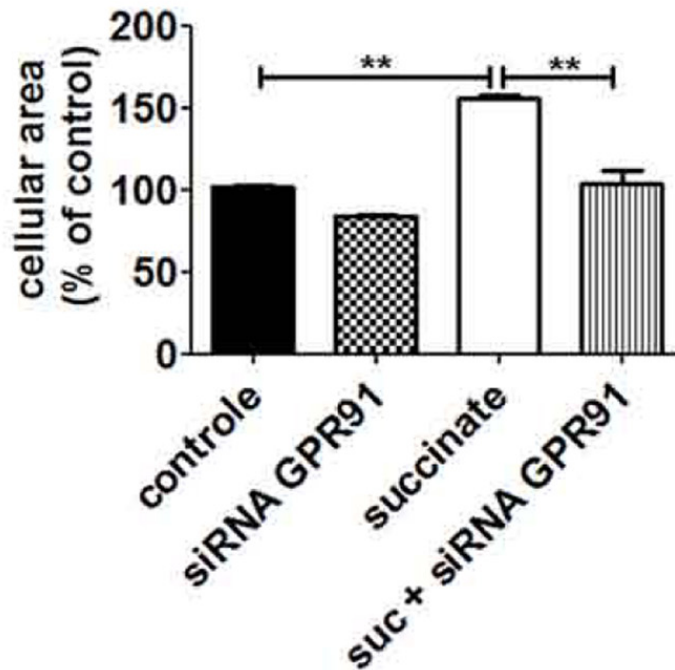

**Aguiar, C. J. et. al.**  
**supplemental 4B & C**
