# Supplementary material for: Succinate causes pathological cardiomyocyte hypertrophy through GPR91 activation
Source: PubMed Central journal article supplement (PMC4296677; doi:10.1186/s12964-014-0078-2), 2014-12-24
Supplement: 12964_2014_78_MOESM6_ESM.pdf [file 12964_2014_78_MOESM6_ESM.pdf]

**A**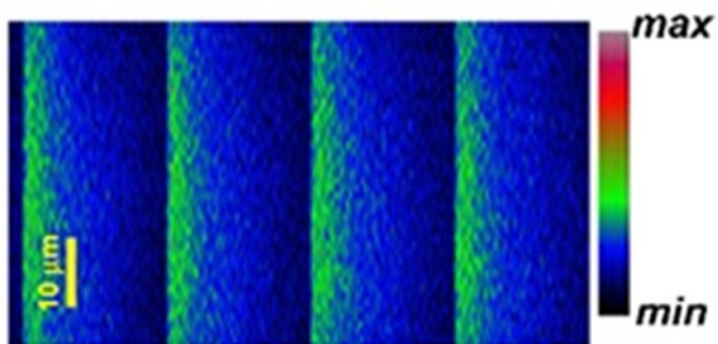**B**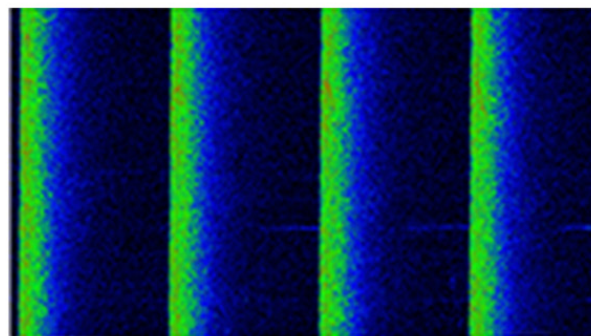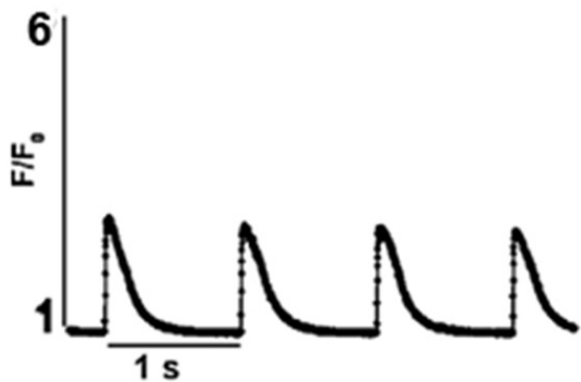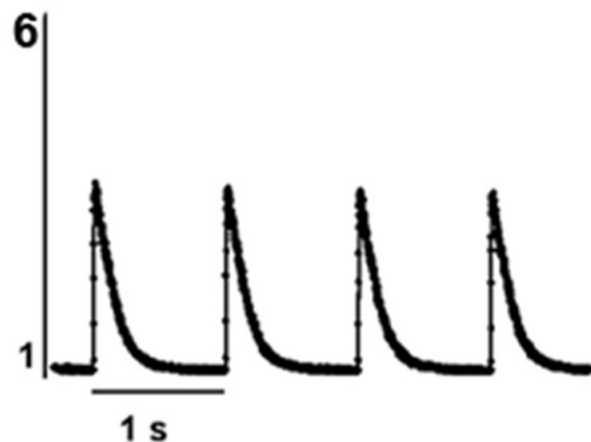**C**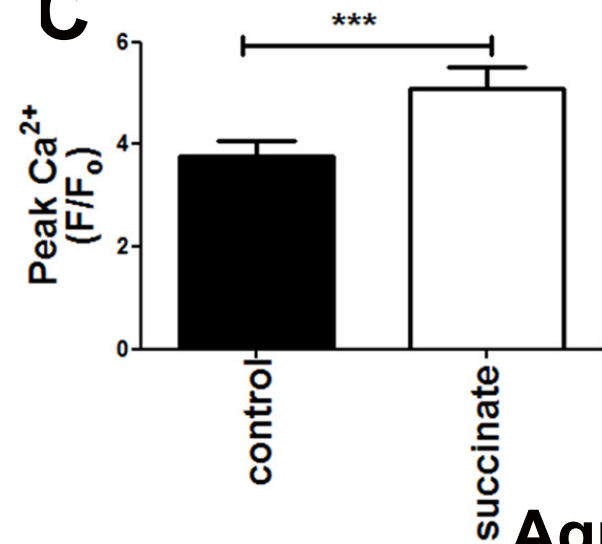**D**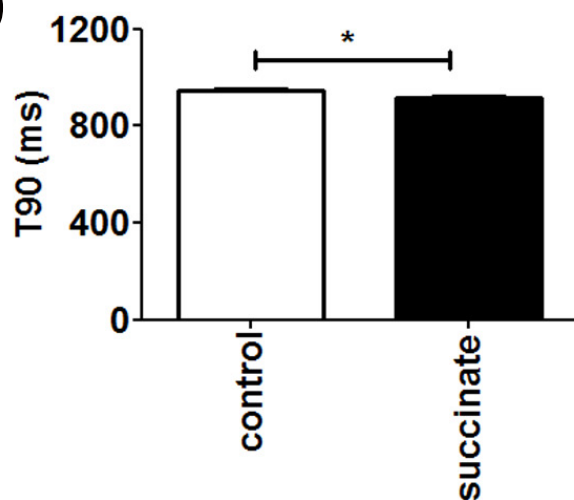

**Aguiar, C. J. et.al.**  
**supplementary 6A, B, C & D**
