# Supplementary material for: Succinate causes pathological cardiomyocyte hypertrophy through GPR91 activation
Source: PubMed Central journal article supplement (PMC4296677; doi:10.1186/s12964-014-0078-2), 2014-12-24
Supplement: 12964_2014_78_MOESM8_ESM.pdf [file 12964_2014_78_MOESM8_ESM.pdf]

**Additional file 8: Table S1. Additional health conditions and characteristics of the cardiac patients**

**Patient 1**

Hypertension  
Aortic aneurysm

**Patient 2**

Hypertension  
Acute myocardial infarction without ST-segment elevation

**Patient 3**

Congestive heart failure  
Alcoholic and smoker

**Patient 4**

Diabetes mellitus  
Congestive heart failure  
LVEF 24%  
Peripheral vascular insufficiency  
Left ventricular thrombus

**Patient 5**

Hypertension  
Diabetes mellitus  
Retinopathy  
Nephropathy  
Congestive heart failure  
LVEF 34%

**Patient 6**

Hypertension  
Smoker  
Unstable angina

**Patient 7**

Congestive heart failure  
LVEF 24%  
Smoker  
Left ventricular thrombus

**Patient 8**

Diabetes mellitus  
Hypertension  
Smoker  
Smoker

**Patient 9**

Hypertension  
Peripheral vascular insufficiency  
Congestive heart failure  
LVEF 30%
